# Supplementary material
Source: Springer Nature journal article supplement (https://www.springermedizin.de/resource/supplementary/12947_2007_249_MOESM2_ESM.pdf/9556576)
Supplement: MOESM2 [file 9556576]

HITACHI 801-24 DYN:65 P:1/1/1/A  
PWR:14 FR:12 SCO:6 50mm 7.5H  
VASC1

STRACE  
IVb  
IR-B  
TSET2

Uv: 26.2%  
Uv: 9.6%  
Vv: 16.4%  
AT: 136ms  
ET: 673ms  
AT/ET: 0.20  
Acc: 1.92%  
PI: 1.00  
RI: 0.62  
RM: 14.2%  
SVS-M:  
17.0%  
TUI: 0.11  
CSA: 0.89cm  
NR: 85%  
SU: 0.99cm  
FU: 0.88cm

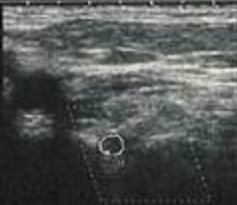

000 US  
+13.0

-13.0  
cm/s  
d(B)

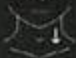

ID:  
105-110-00-55

SPECIALIZED CLINIC OF TABRIZ UNIVERSITY

NO. 19/19
